# Supplementary material
Source: Research Square preprint supplement (doi:10.21203/rs.3.rs-12993/v4)
Supplement: Supplementary file 1 [file 068821b1215345c7140f74fa.pdf]

**Table 4.** Centroid location reliability for sagittal UO-MRI scans

|             | Medial Compartment         |         |           |           |            |            | Lateral Compartment        |         |           |           |            |            |
|-------------|----------------------------|---------|-----------|-----------|------------|------------|----------------------------|---------|-----------|-----------|------------|------------|
|             | ICC <sub>3,1</sub> (95%CI) | P-Value | X SEM (%) | Y SEM (%) | X SEM (mm) | Y SEM (mm) | ICC <sub>3,1</sub> (95%CI) | P-Value | X SEM (%) | Y SEM (%) | X SEM (mm) | Y SEM (mm) |
| Inter-Rater | 0.99 (0.97-1.00)           | <0.001  | 0.71      | 1.62      | 0.44       | 0.64       | 0.95 (0.83-0.99)           | <0.001  | 0.95      | 2.81      | 0.57       | 1.10       |
| Test-Retest | 0.94 (0.56-0.99)           | <0.001  | 1.22      | 1.78      | 0.68       | 0.83       | 0.98 (0.91-0.99)           | <0.001  | 1.59      | 1.39      | 1.19       | 0.51       |
| Intra-Rater | 0.99 (0.94-1.00)           | <0.001  | 0.15      | 2.44      | 0.14       | 0.76       | 1.00 (0.99-1.00)           | <0.001  | 0.34      | 0.57      | 0.18       | 0.23       |
